# Supplementary material for: Mapping of Family Reported Outcome Measure (FROM-16) scores to EQ-5D: algorithm to calculate utility values
Source: Springer Nature journal article supplement (doi:10.1007/s11136-023-03590-z), 2024-02-25
Supplement: MOESM1 [file 26780468]

## Supplementary File 1

### Mapping of Family Reported Outcome Measure (FROM-16) scores to EQ-5D: Algorithm to calculate Utility Values

Shah RM, Salek MS, Finlay AY, Kay R, Nixon SJ, Otwombe K, Ali MF, Ingram J

Corresponding author:

[ShahR45@cardiff.ac.uk](mailto:ShahR45@cardiff.ac.uk)

#### INDEX: Tables/figures included in the online resource

Table S1 FROM-16 items compared to EQ-5D domains

Table S2a Descriptive statistics: Medical specialties included in the study

Table S2b EQ-5D-3L dimension scores (n=4228)

Table S2c FROM-16 Individual item scores

Table S2d Spearman's rho Correlations showing relationship between different items and testing multicollinearity#

Table S3 Correlation between FROM -16 and EQ-5D-3L

Table S4 Predicted EQ-5D responses across 10 cross validation Sets

Table S5 Mean utility value difference across all ten cross validation sets

Table S6 Actual utility values to predicted utility values across ten models (n=2114) using the Expected utility method

Figure S1 Comparison of predicted and observed EQ-5D-3L responses across ten validation sets

Figure S2 (a)-(j) The cumulative percentage of observed EQ-5D-3L data vs. simulated data across ten validation sets.

Figure S3 (a)-(j) Histograms demonstrating the mean difference between predicted and actual utility scores for each Monte Carlo simulation

**Table S1** FROM-16 items compared to EQ-5D domains\*

| EQ-5D Domain           | Covariates: age/sex |                                    |                         | Covariates: FROM-16 items |                                    |                         | Covariates: age/sex/FROM-16 items |                                    |                         |
|------------------------|---------------------|------------------------------------|-------------------------|---------------------------|------------------------------------|-------------------------|-----------------------------------|------------------------------------|-------------------------|
|                        | -2 log likelihood   | Chi-square comparing to full model | Degrees of freedom (df) | -2 log likelihood         | Chi-square comparing to full model | Degrees of freedom (df) | -2 log likelihood                 | Chi-square comparing to full model | Degrees of freedom (df) |
| Mobility               | 781.6               | 151.9                              | 4                       | 4946.9                    | 341.9                              | 32                      | 5173.7                            | 466.1                              | 36                      |
| Selfcare               | 744.8               | 12.6                               | 4                       | 3582.8                    | 342.2                              | 32                      | 3772.6                            | 352.6                              | 36                      |
| Usual activities       | 1049.8              | 50.7                               | 4                       | 6258.6                    | 712.0                              | 32                      | 6589.8                            | 764.1                              | 36                      |
| Pain and discomfort    | 1068.3              | 114.8                              | 4                       | 6885.2                    | 448.4                              | 32                      | 7279.9                            | 551.8                              | 36                      |
| Anxiety and depression | 1078.1              | 177.3                              | 4                       | 5975.6                    | 1642.9                             | 32                      | 6298.1                            | 1703.2                             | 36                      |

\*The significance of the FROM-16 items and age and sex compared to the model containing age, sex, and the FROM-16 items for each EQ-5D domain

**Table S2a** Descriptive statistics: Medical specialties included in the study

| Patients (n=4228)          | Number (%)  |
|----------------------------|-------------|
| Medical specialties        |             |
| Audiology                  | 19 (0.4)    |
| Cardiology                 | 239 (5.7)   |
| Chronic pain               | 7 (0.2)     |
| Critical care              | 1 (0.02)    |
| Dermatology                | 127 (3.0)   |
| Endocrinology              | 266 (6.3)   |
| Gastroenterology           | 151 (3.6)   |
| Genetic/ Rare disease      | 44 (1.0)    |
| Gynaecology                | 37 (0.9)    |
| Haematology                | 179 (4.2)   |
| Hepatology                 | 10 (0.2)    |
| Immunology                 | 12 (0.3)    |
| Infectious diseases        | 10 (0.2)    |
| Movement disorder          | 10 (0.2)    |
| Nephrology                 | 55 (1.3)    |
| Neurology                  | 1522 (36.0) |
| Oncology                   | 241 (5.7)   |
| Ophthalmology              | 89 (2.1)    |
| Orthopaedics               | 24 (0.6)    |
| Otolaryngology             | 6 (0.1)     |
| Rehabilitation medicine    | 30 (0.7)    |
| Paediatrics                | 134 (3.2)   |
| Psychiatry                 | 311 (7.4)   |
| Respiratory medicine       | 261 (6.2)   |
| Rheumatology               | 302 (7.1)   |
| Urology                    | 21 (0.5)    |
| Wound healing              | 1 (0.02)    |
| Multiple health conditions | 91 (2.2)    |
| Not stated                 | 28 (0.7)    |

**Table S2b** EQ-5D-3L dimension scores (n=4228)

| EQ-5D dimensions       | No problems N (%) | Some problems N (%) | Extreme problems N (%) |
|------------------------|-------------------|---------------------|------------------------|
| Mobility               | 2939 (69.5)       | 1231 (29.1)         | 58 (1.4)               |
| Selfcare               | 3588 (84.9)       | 540 (12.8)          | 100 (2.4)              |
| Usual activity         | 2468 (58.4)       | 1447 (34.2)         | 313 (7.4)              |
| Pain and discomfort    | 2063 (48.8)       | 1780 (42.1)         | 385 (9.1)              |
| Anxiety and depression | 1618 (38.3)       | 2157 (51)           | 453 (10.7)             |

**Table S2c** FROM-16 Individual item scores

| FROM-16 item           | Not at All N (%) | A little N (%) | A lot N (%) |
|------------------------|------------------|----------------|-------------|
| Worried                | 239 (5.7)        | 1805 (42.7)    | 2184 (51.7) |
| Angry                  | 1878 (44.4)      | 1638 (38.7)    | 712 (16.8)  |
| Sad                    | 645 (15.3)       | 1769 (41.8)    | 1814 (42.9) |
| Frustrated             | 791 (18.7)       | 1710 (40.4)    | 1727 (40.8) |
| Talking about Thoughts | 1599 (37.8)      | 1421 (33.6)    | 1208 (28.6) |
| Difficulty caring      | 1179 (27.9)      | 1748 (41.3)    | 1301 (30.8) |
| Time for self          | 1660 (39.3)      | 1543 (36.5)    | 1025 (24.2) |
| Travel                 | 2553 (60.4)      | 991 (23.4)     | 684 (16.2)  |
| Eating habits          | 2425 (57.4)      | 1242 (29.4)    | 561 (13.3)  |
| Family activities      | 902 (21.3)       | 1821 (43.1)    | 1505 (35.6) |
| Holiday                | 1341 (31.7)      | 1294 (30.6)    | 1593 (37.7) |
| Sex life               | 1901 (45)        | 944 (22.3)     | 1383 (32.7) |
| Work/study             | 2496 (59)        | 1127 (26.7)    | 605 (14.3)  |
| Family relationships   | 1929 (45.6)      | 1530 (36.2)    | 769 (18.2)  |
| Family expenses        | 1769 (41.8)      | 1460 (34.5)    | 999 (23.6)  |
| Sleep                  | 1233 (29.2)      | 1644 (38.9)    | 1351 (32)   |

**Table S2d** Spearman's rho Correlations showing relationship between different items and testing multicollinearity<sup>#</sup>

| FROM-16 Items          | Worried | Angry  | Sad    | Frustrated | Talking about thoughts | Difficulty caring | Time for self | Travel | Eating habits | Family activities | Holiday | Sexlife | Work /study | Family relationships | Family expenses | Sleep |
|------------------------|---------|--------|--------|------------|------------------------|-------------------|---------------|--------|---------------|-------------------|---------|---------|-------------|----------------------|-----------------|-------|
| Worried                | 1       | .      | .      |            |                        |                   |               |        |               |                   |         |         |             |                      |                 |       |
| Angry                  | .424**  | 1      |        |            |                        |                   |               |        |               |                   |         |         |             |                      |                 |       |
| Sad                    | .534**  | .482** | 1      |            |                        |                   |               |        |               |                   |         |         |             |                      |                 |       |
| Frustrated             | .453**  | .573** | .497** | 1          |                        |                   |               |        |               |                   |         |         |             |                      |                 |       |
| Talking about thoughts | .411**  | .453** | .383** | .444**     | 1                      |                   |               |        |               |                   |         |         |             |                      |                 |       |
| Difficulty caring      | .465**  | .454** | .471** | .501**     | .444**                 | 1                 |               |        |               |                   |         |         |             |                      |                 |       |
| Time for self          | .398**  | .373** | .394** | .406**     | .440**                 | .619**            | 1             |        |               |                   |         |         |             |                      |                 |       |
| Travel                 | .285**  | .284** | .263** | .314**     | .328**                 | .443**            | .557**        | 1      |               |                   |         |         |             |                      |                 |       |
| Eating habits          | .283**  | .305** | .260** | .313**     | .342**                 | .388**            | .455**        | .437** | 1             |                   |         |         |             |                      |                 |       |
| Family activities      | .364**  | .355** | .389** | .421**     | .385**                 | .511**            | .567**        | .501** | .455**        | 1                 |         |         |             |                      |                 |       |
| Holiday                | .352**  | .332** | .342** | .383**     | .370**                 | .497**            | .584**        | .532** | .418**        | .633**            | 1       |         |             |                      |                 |       |
| Sex life               | .209**  | .228** | .186** | .239**     | .290**                 | .237**            | .332**        | .320** | .322**        | .356**            | .415**  | 1       |             |                      |                 |       |
| Work/study             | .335**  | .339** | .341** | .339**     | .361**                 | .446**            | .505**        | .418** | .414**        | .461**            | .411**  | .290**  | 1           |                      |                 |       |
| Family relationships   | .392**  | .397** | .420** | .405**     | .426**                 | .548**            | .528**        | .406** | .412**        | .512**            | .435**  | .222**  | .511**      | 1                    |                 |       |
| Family expenses        | .341**  | .334** | .334** | .358**     | .348**                 | .462**            | .501**        | .437** | .403**        | .479**            | .480**  | .273**  | .426**      | .450**               | 1               |       |
| Sleep                  | .462**  | .418** | .436** | .424**     | .459**                 | .510**            | .566**        | .442** | .481**        | .507**            | .513**  | .384**  | .451**      | .486**               | .492**          | 1     |

\*\* Correlation is significant at the 0.01 level (2-tailed). <sup>#</sup>Multicollinearity is present when Correlation coefficient > .7

**Table S3** Correlation<sup>†</sup> between FROM -16 and EQ-5D-3L

| FROM-16                         | Correlation to EQ-5D                                  | r                                  |
|---------------------------------|-------------------------------------------------------|------------------------------------|
| Emotional domain (item 1-6)     | Anxiety/depression> Activity>Self care>Pain>mobility  | 0.523*>0.279*>0.176*>0.165*>0.132* |
| Personal and social (item 7-16) | Anxiety/depression>Activity> Pain>Self care> mobility | 0.495*>0.367*>0.239*>0.220*>0.190* |
| FROM-16 total score             | EQ-5D utility values                                  | 0.450*                             |

† Spearman correlation; \* p-value 0.05

**Table S4** Predicted EQ-5D responses across 10 cross validation Sets

| <b>% of accuracy</b> | <b>Set 1</b> | <b>Set 2</b> | <b>Set 3</b> | <b>Set 4</b> | <b>Set 5</b> | <b>Set 6</b> | <b>Set 7</b> | <b>Set 8</b> | <b>Set 9</b> | <b>Set 10</b> | <b>Average</b> |
|----------------------|--------------|--------------|--------------|--------------|--------------|--------------|--------------|--------------|--------------|---------------|----------------|
| <b>90-100%</b>       | 80           | 86.66        | 86.66        | 86.66        | 86.66        | 73.33        | 73.33        | 73.33        | 73.33        | 73.33         | 79.33          |
| <b>70-100%</b>       | 93.33        | 100          | 100          | 93.33        | 100          | 100          | 93.33        | 100          | 93.33        | 93.33         | 96.67          |
| <b>&lt;70%</b>       | 0.06         | 0.06         | 0            | 0.06         | 0            | 0            | 0.06         | 0            | 0.06         | 0.06          | 0.04           |

**Table S5** Mean utility value difference across all ten cross validation sets

|                                                  | <b>Set 1</b> | <b>Set 2</b> | <b>Set 3</b> | <b>Set 4</b> | <b>Set 5</b> | <b>Set 6</b> | <b>Set 7</b> | <b>Set 8</b> | <b>Set 9</b> | <b>Set 10</b> | <b>Average</b> |
|--------------------------------------------------|--------------|--------------|--------------|--------------|--------------|--------------|--------------|--------------|--------------|---------------|----------------|
| <b>Mean Utility Value Difference</b>             | 0.006        | 0.008        | 0.027        | 0.005        | 0.027        | 0.020        | 0.029        | 0.005        | 0.017        | 0.007         | <b>0.015</b>   |
| <b>% Utility Values within 0.05 of Actual UV</b> | 53.6         | 54.6         | 51.8         | 58.6         | 53.3         | 53.8         | 51.6         | 56.6         | 54.3         | 54.5          | <b>54.27</b>   |
| <b>% Utility Values within 0.1 of Actual UV</b>  | 58.8         | 59.5         | 56.3         | 62.9         | 57.9         | 58.6         | 56.5         | 61.9         | 59           | 59.8          | <b>59.12</b>   |
| <b>% Utility Values within 0.2 of Actual UV</b>  | 73.4         | 73.9         | 70.2         | 74.6         | 73.3         | 72.8         | 71.3         | 75.4         | 71.8         | 73.6          | <b>73.03</b>   |
| <b>% Utility Values within 0.3 of Actual UV</b>  | 84.1         | 83           | 80.6         | 83.2         | 81.8         | 82.3         | 81.6         | 83.8         | 81.7         | 82.9          | <b>82.50</b>   |

Table S6 Actual utility values to predicted utility values across ten models (n=2114)  
using the Expected utility method

| Expected Utility Method*  |                |        |     |                   |       |       |                         |       |       |
|---------------------------|----------------|--------|-----|-------------------|-------|-------|-------------------------|-------|-------|
| Cross-validation Set      | Actual Utility |        |     | Predicted Utility |       |       | Actual versus Predicted |       |       |
|                           | Mean (SD)      | Min    | Max | Mean (SD)         | Min   | Max   | Diff in means           | MSE   | MAE   |
| Set 1                     | 0.667(0.342)   | -0.594 | 1   | 0.653(0.159)      | 0.187 | 0.905 | 0.014                   | 0.090 | 0.229 |
| Set 2                     | 0.669(0.331)   | -0.594 | 1   | 0.655(0.166)      | 0.040 | 0.912 | 0.014                   | 0.088 | 0.226 |
| Set 3                     | 0.673(0.331)   | -0.594 | 1   | 0.637(0.161)      | 0.197 | 0.906 | 0.037                   | 0.087 | 0.229 |
| Set 4                     | 0.672(0.326)   | -0.594 | 1   | 0.657(0.164)      | 0.161 | 0.921 | 0.015                   | 0.085 | 0.222 |
| Set 5                     | 0.680(0.326)   | -0.594 | 1   | 0.645(0.162)      | 0.142 | 0.896 | 0.035                   | 0.085 | 0.226 |
| Set 6                     | 0.679(0.320)   | -0.594 | 1   | 0.648(0.163)      | 0.158 | 0.914 | 0.030                   | 0.083 | 0.223 |
| Set 7                     | 0.677(0.331)   | -0.594 | 1   | 0.643(0.160)      | 0.208 | 0.910 | 0.033                   | 0.089 | 0.230 |
| Set 8                     | 0.672(0.330)   | -0.594 | 1   | 0.660(0.166)      | 0.140 | 0.909 | 0.012                   | 0.087 | 0.224 |
| Set 9                     | 0.674(0.336)   | -0.594 | 1   | 0.654(0.152)      | 0.185 | 0.897 | 0.020                   | 0.087 | 0.227 |
| Set 10                    | 0.666(0.336)   | -0.594 | 1   | 0.656 (0.162)     | 0.204 | 0.921 | 0.010                   | 0.090 | 0.227 |
| <b>Average of 10 Sets</b> | 0.673(0.331)   | -0.594 | 1   | 0.651(0.162)      | 0.162 | 0.909 | 0.022                   | 0.087 | 0.226 |

\*Level 1 (No effect) was a reference category; SD, Standard Deviation; Min, Minimum; Max, Maximum; Diff in means, Difference in means; MSE, Mean Square Error; MAE, Mean Absolute Error.

**Fig S1** Comparison of predicted and observed EQ-5D-3L responses across ten validation sets

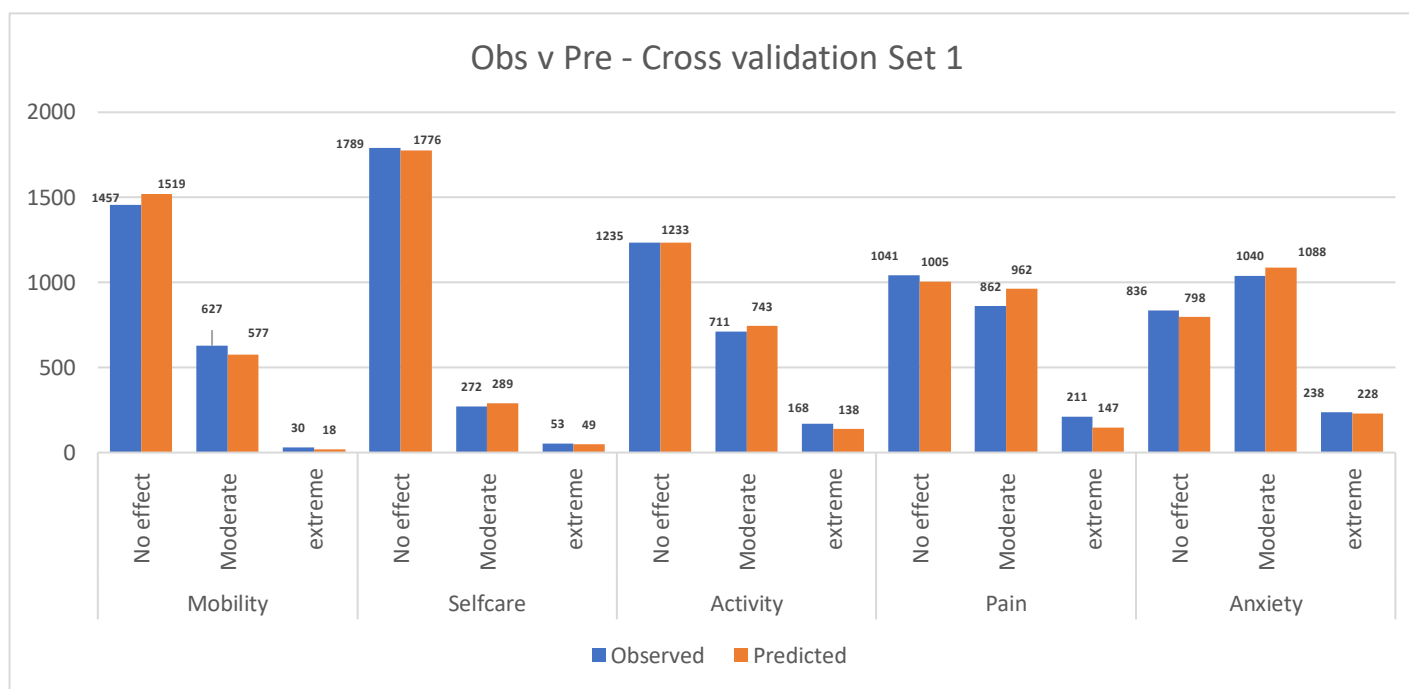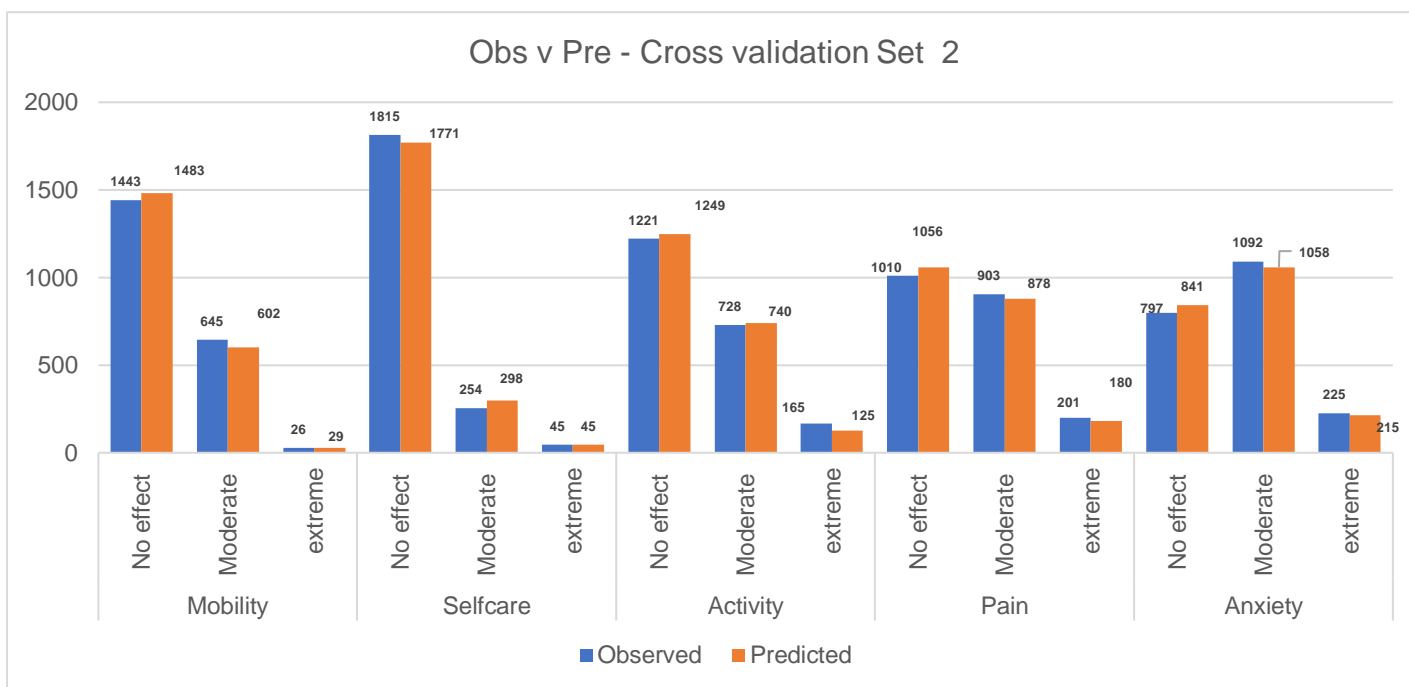

**Fig S1 (Contd)**

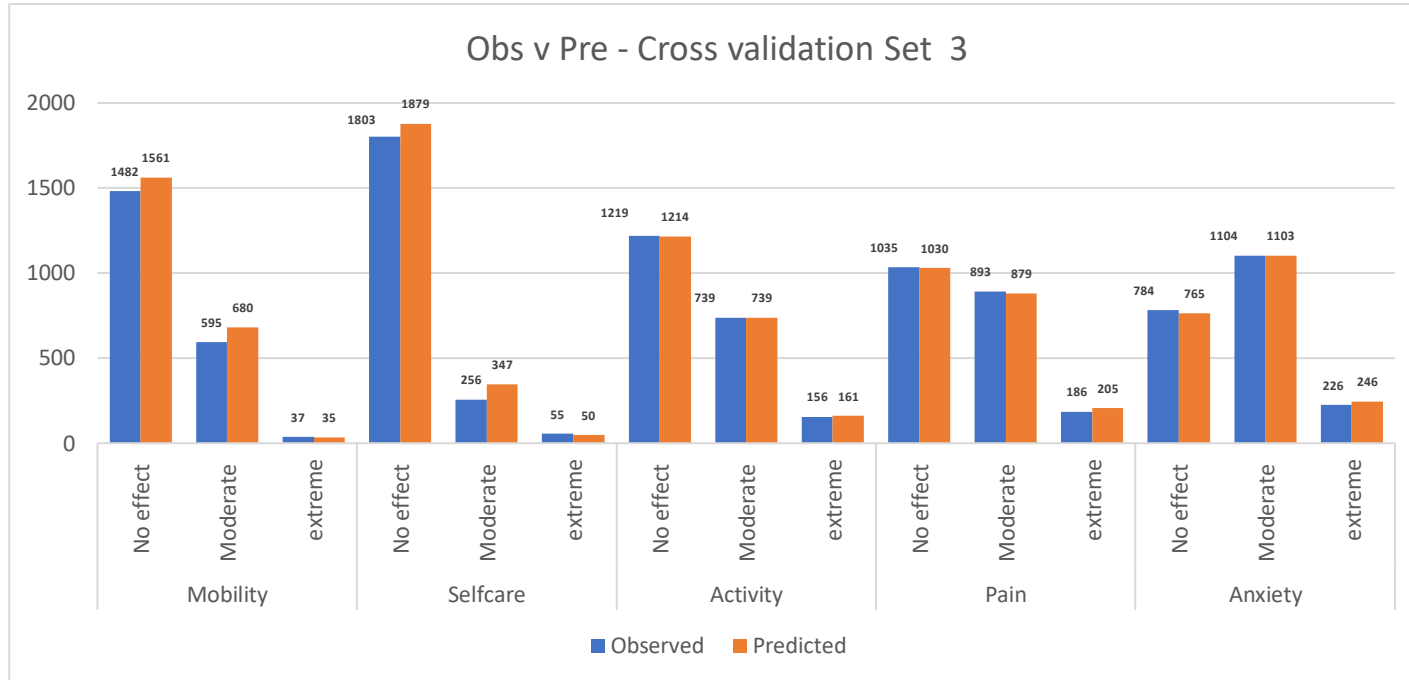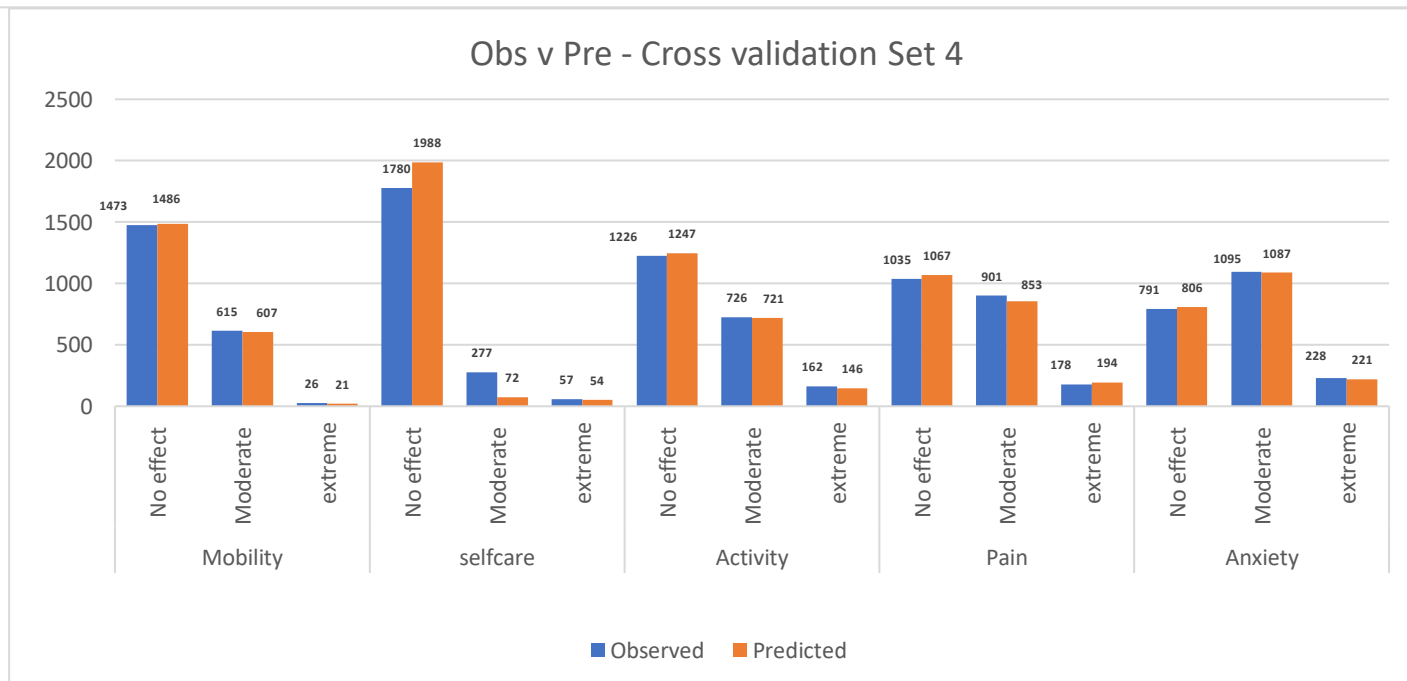



Fig S1 (Contd)

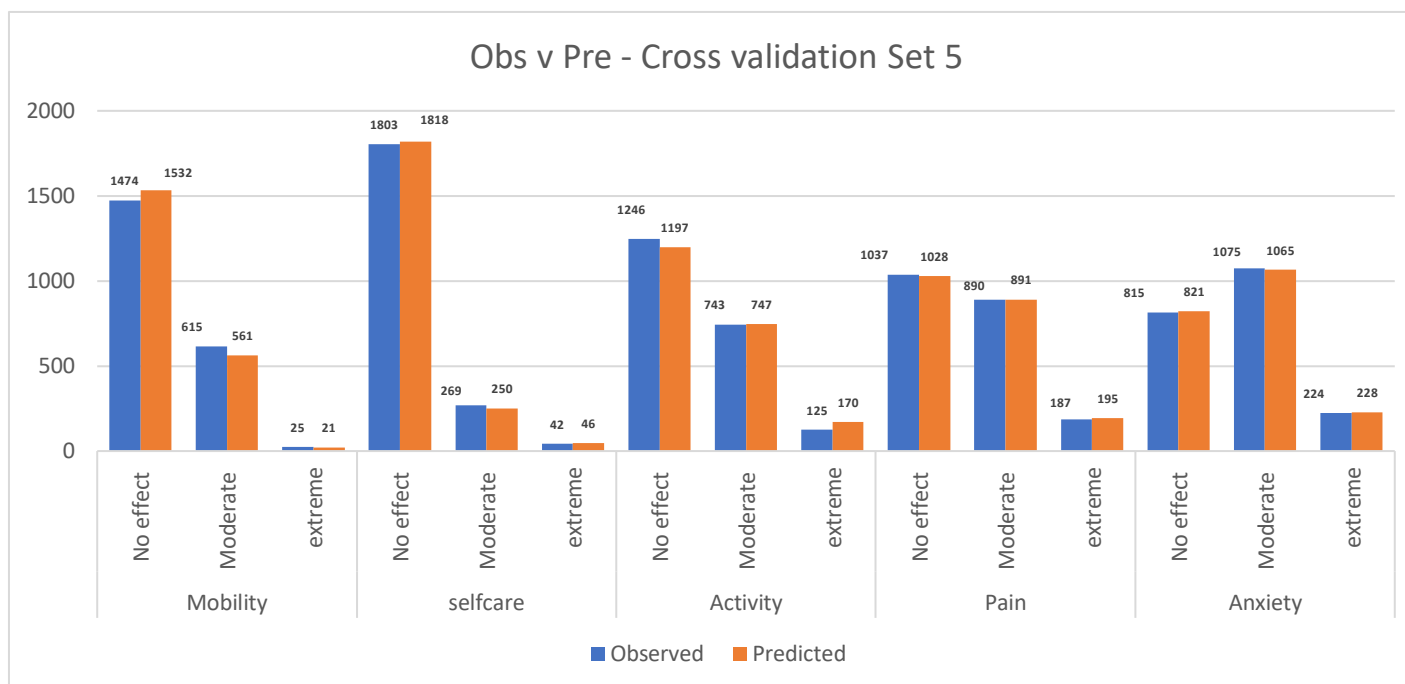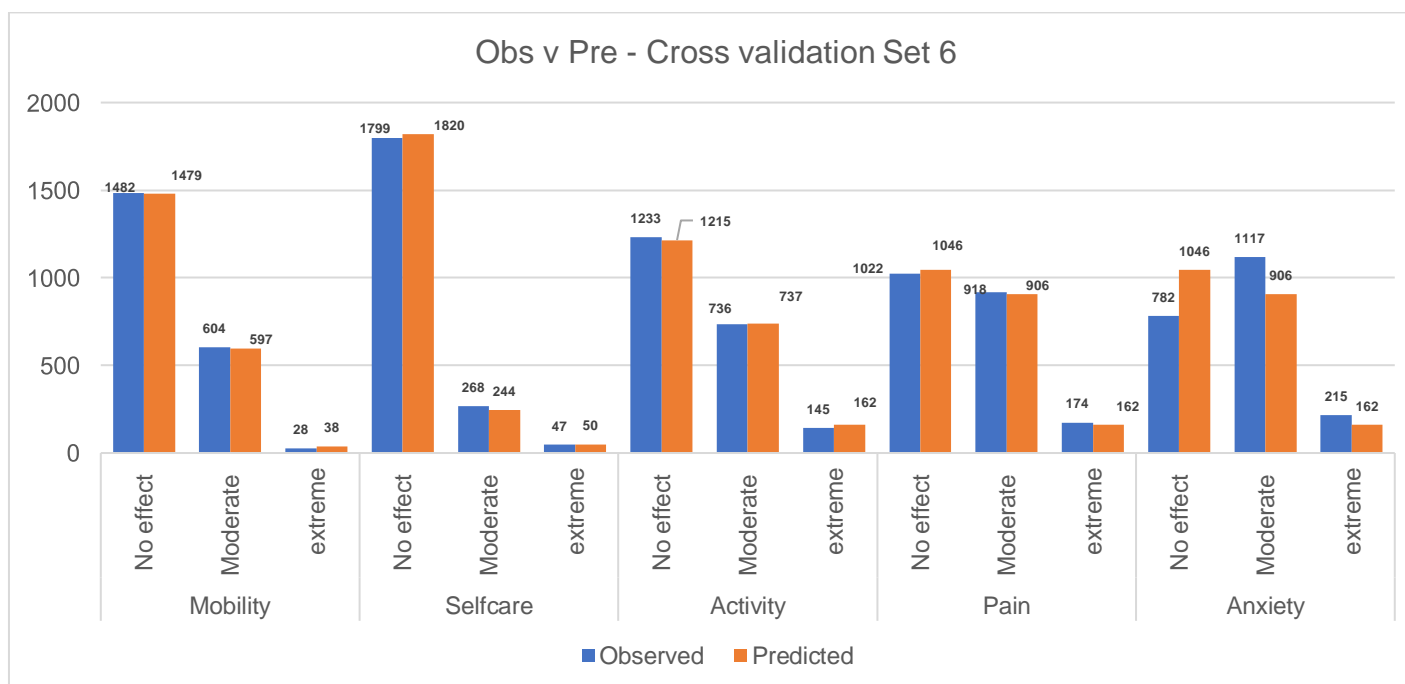

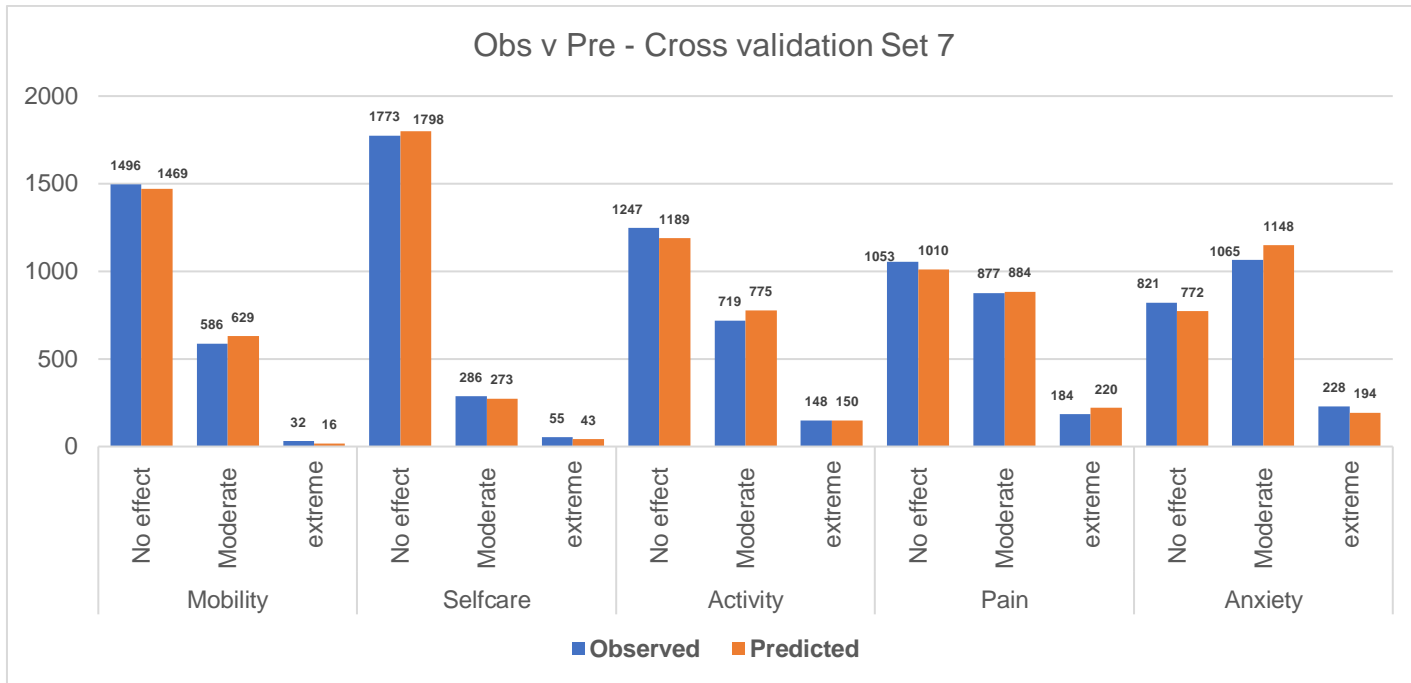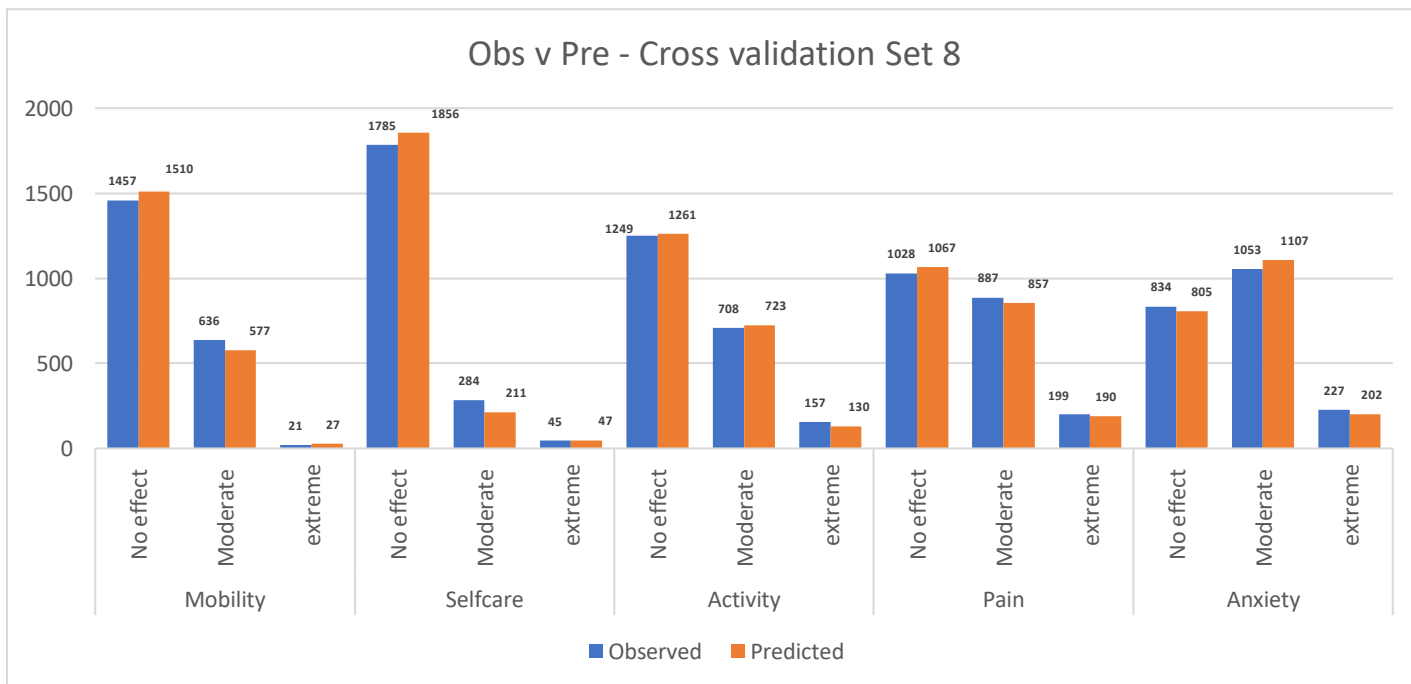

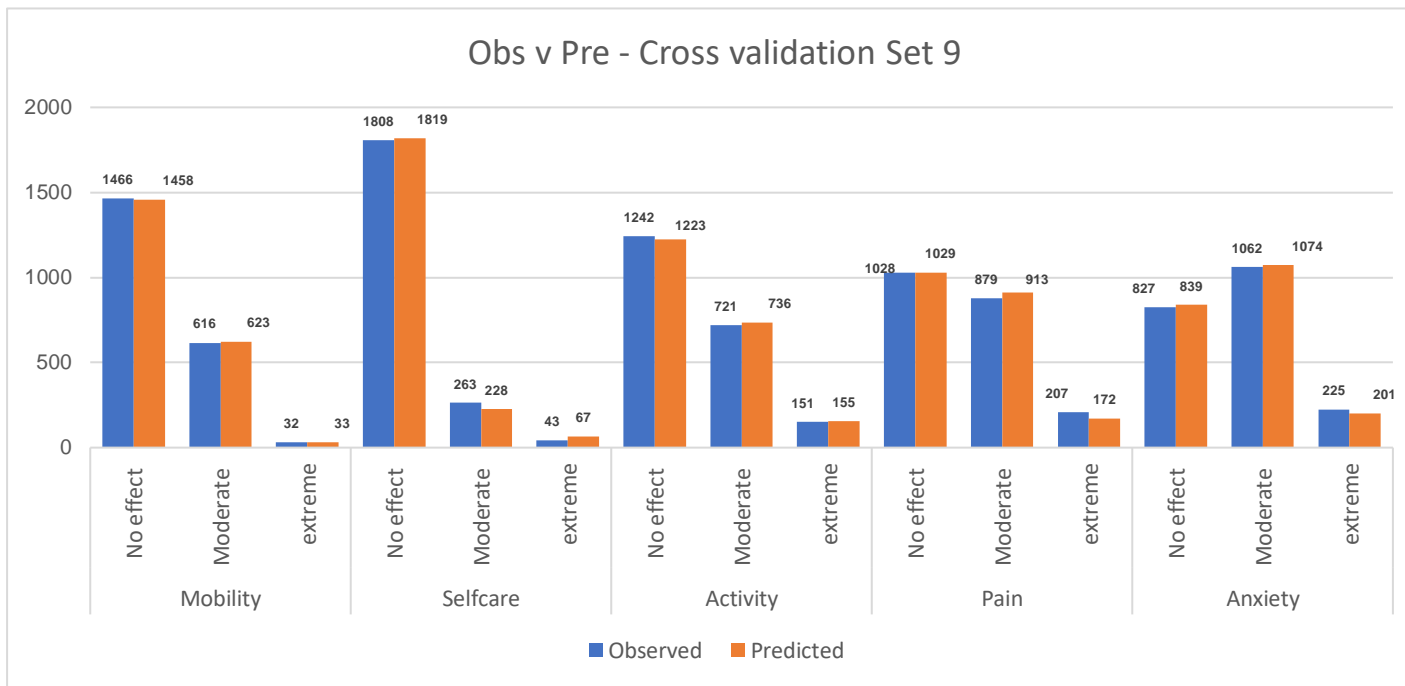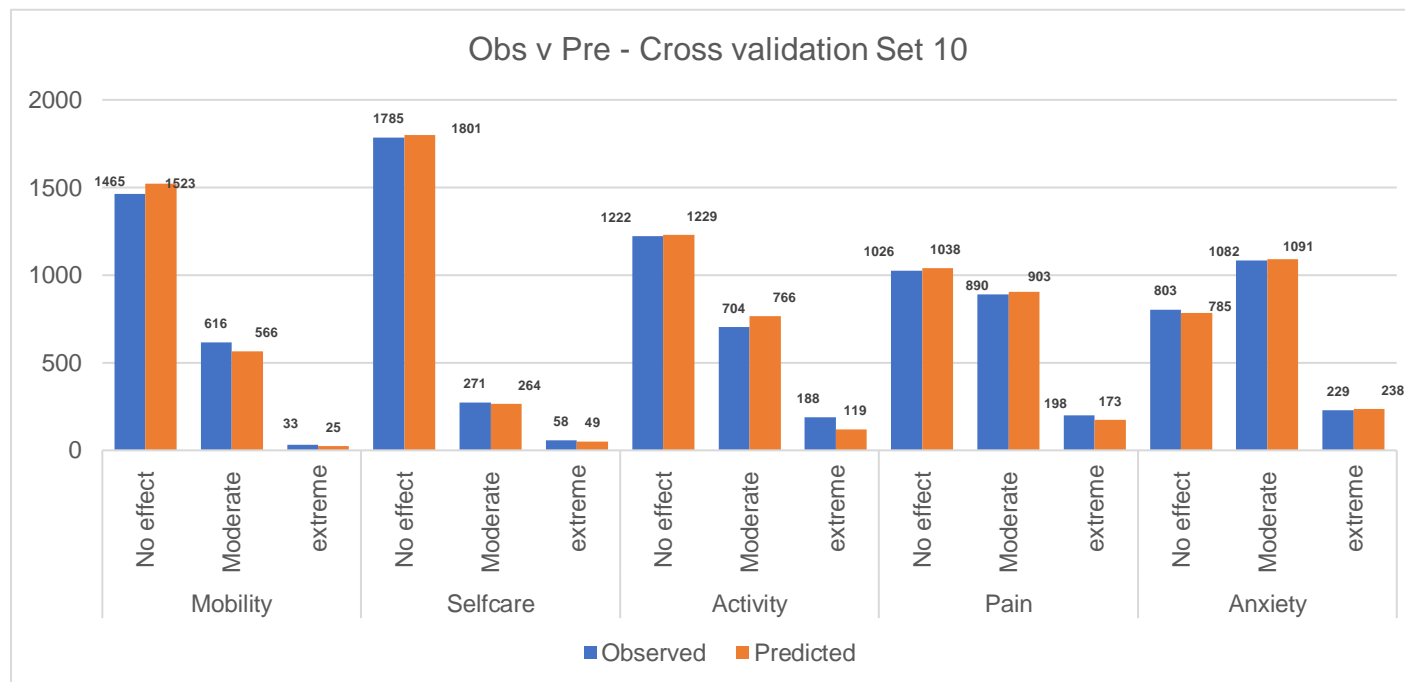

**Fig S2 (a)-(j)** The cumulative percentage of observed EQ-5D-3L data vs. simulated data across ten validation sets.

(a) Model one: Cross validation set 1

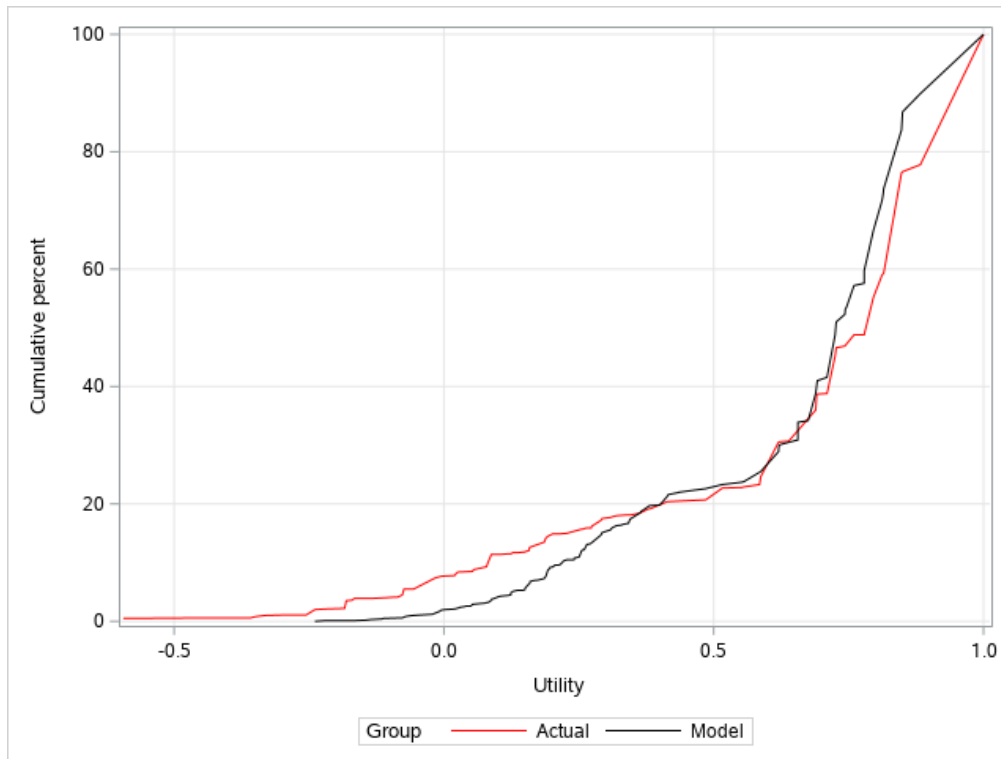

(b) Model one: Cross validation set 2

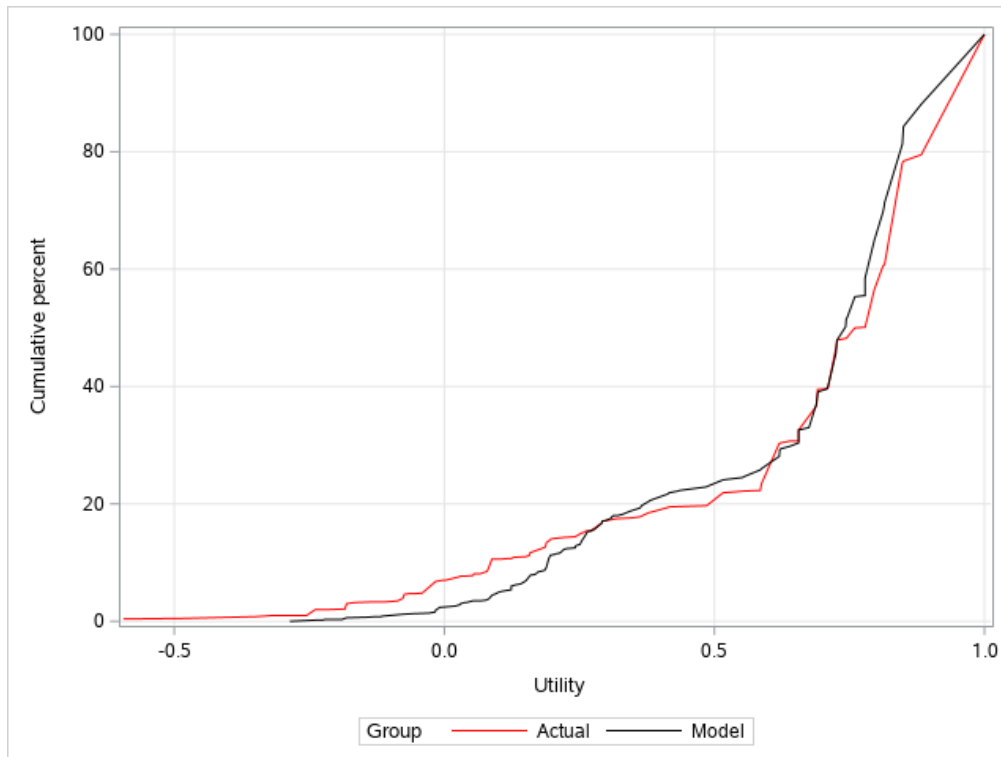

(c) Model three: Cross validation set 3

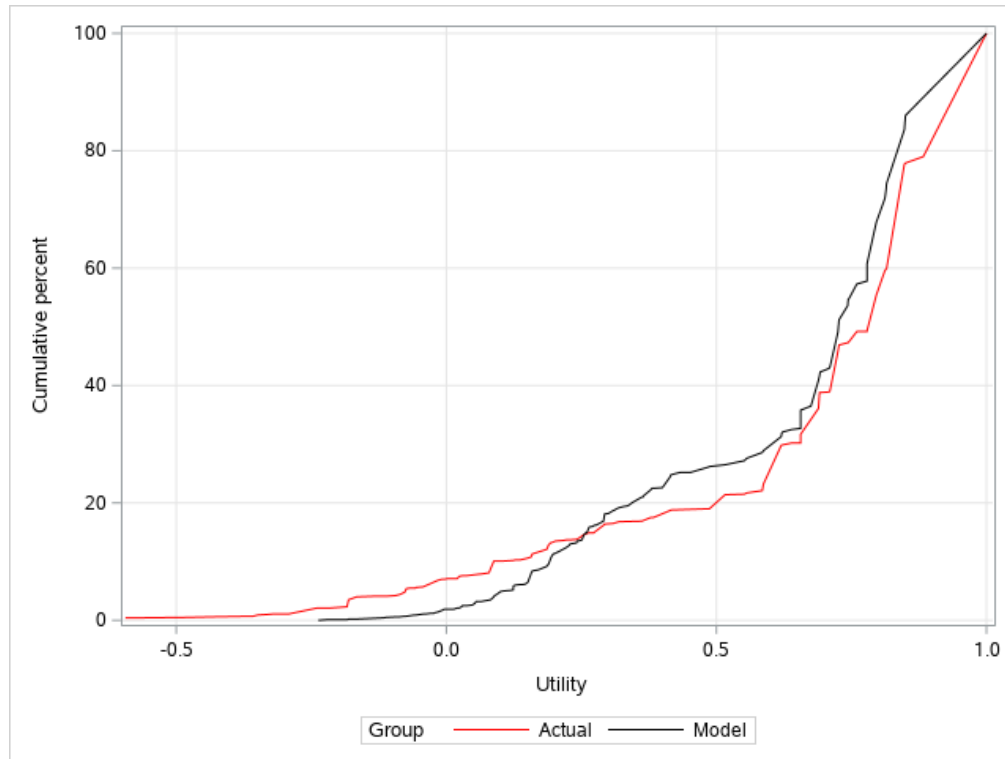

(d) Model four: Cross validation set 4

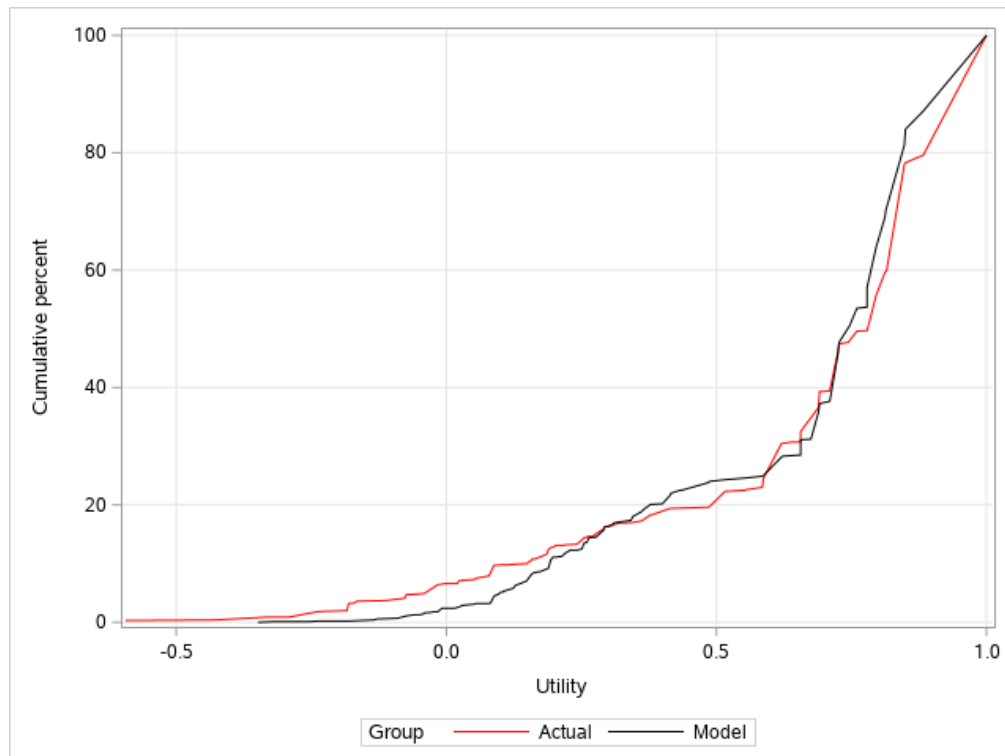

(e) Model five: Cross validation set 5

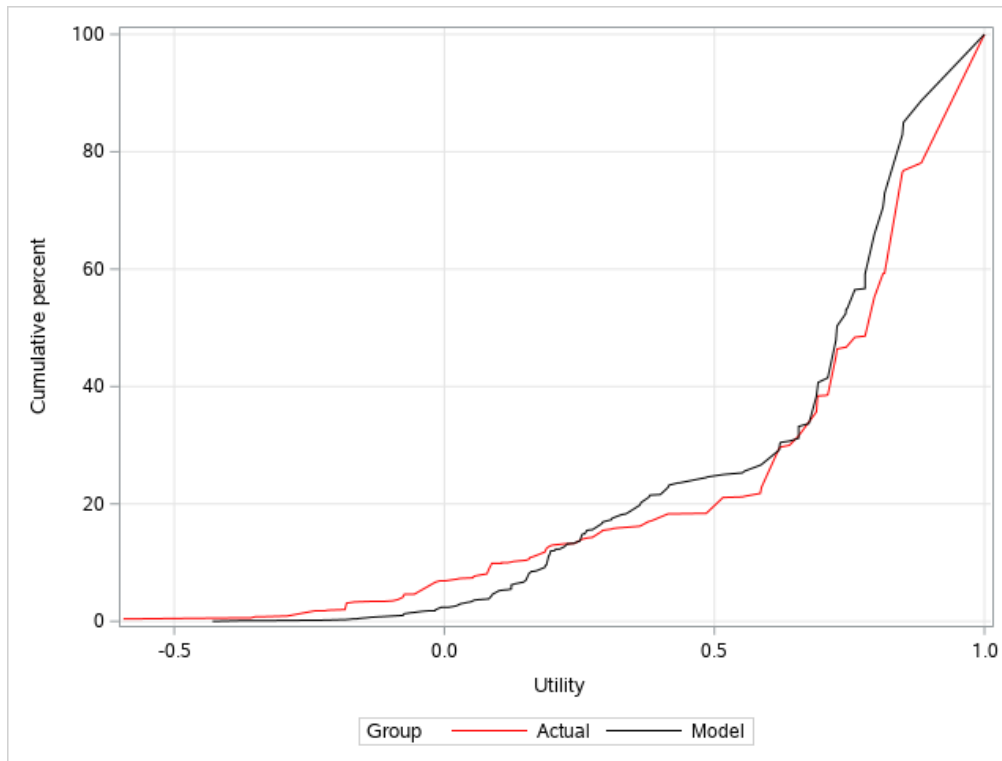

(f) Model six: Cross validation set 6

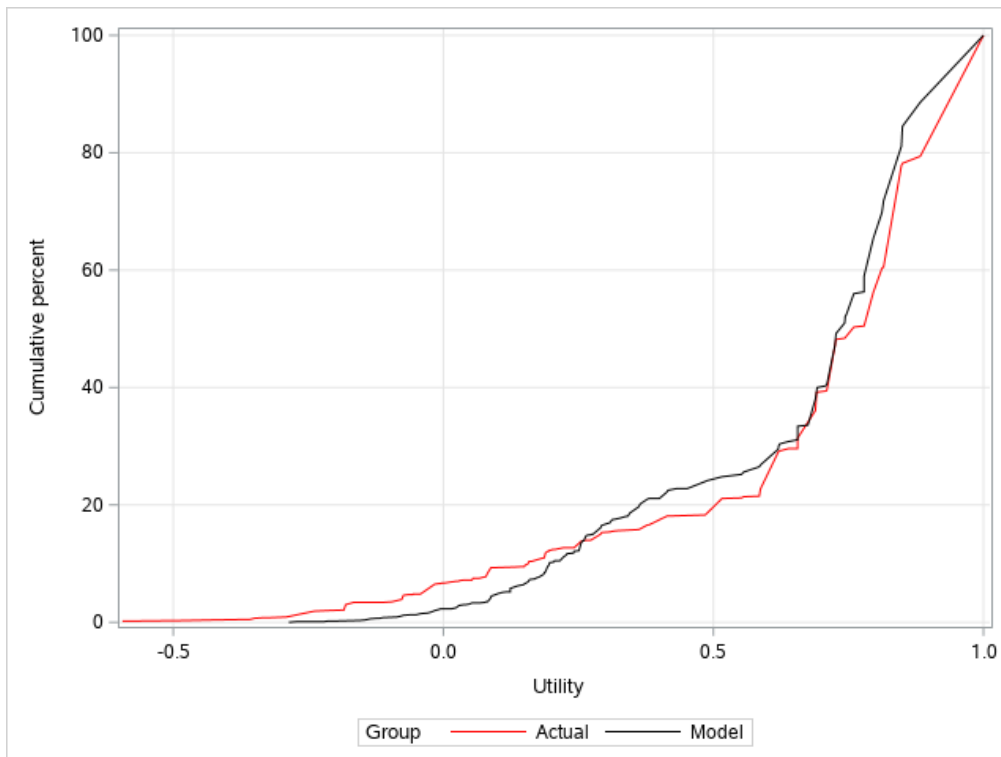

(g) Model seven: Cross validation set 7

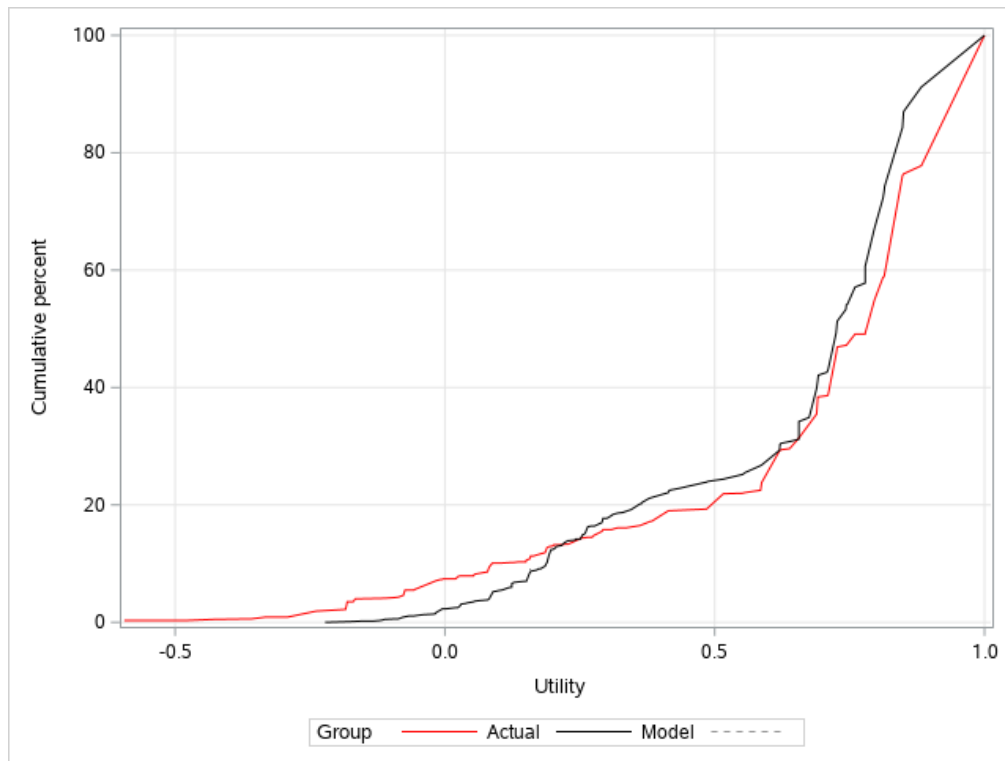

(h) Model eight: Cross validation set 8

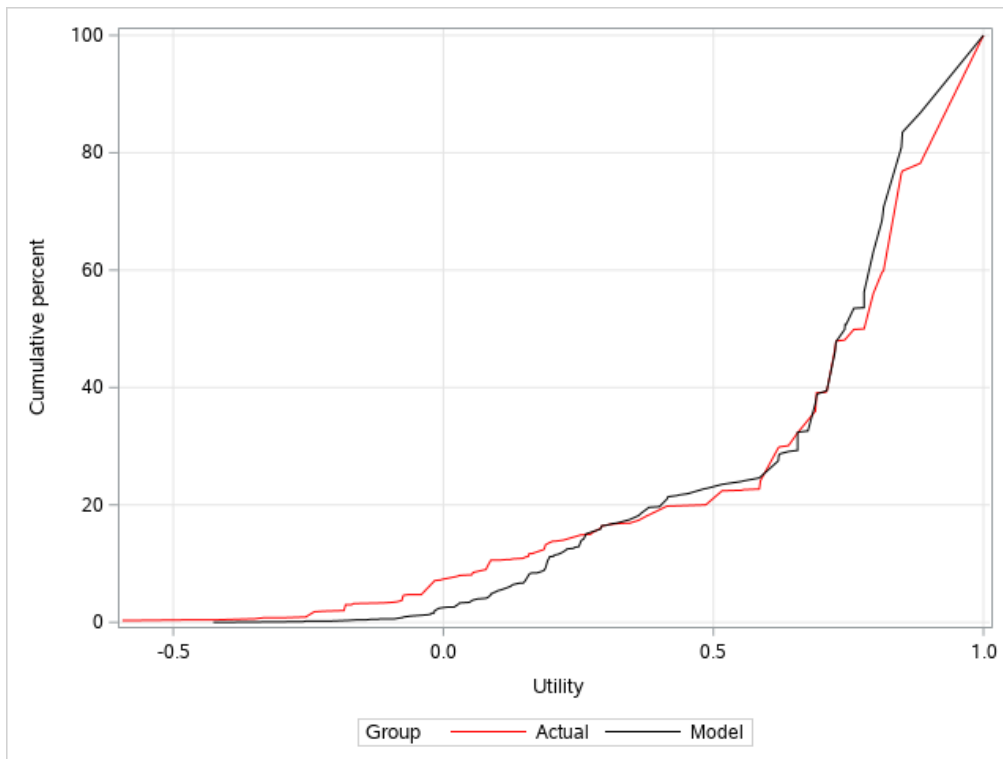

(i) Model Nine: Cross validation set 9

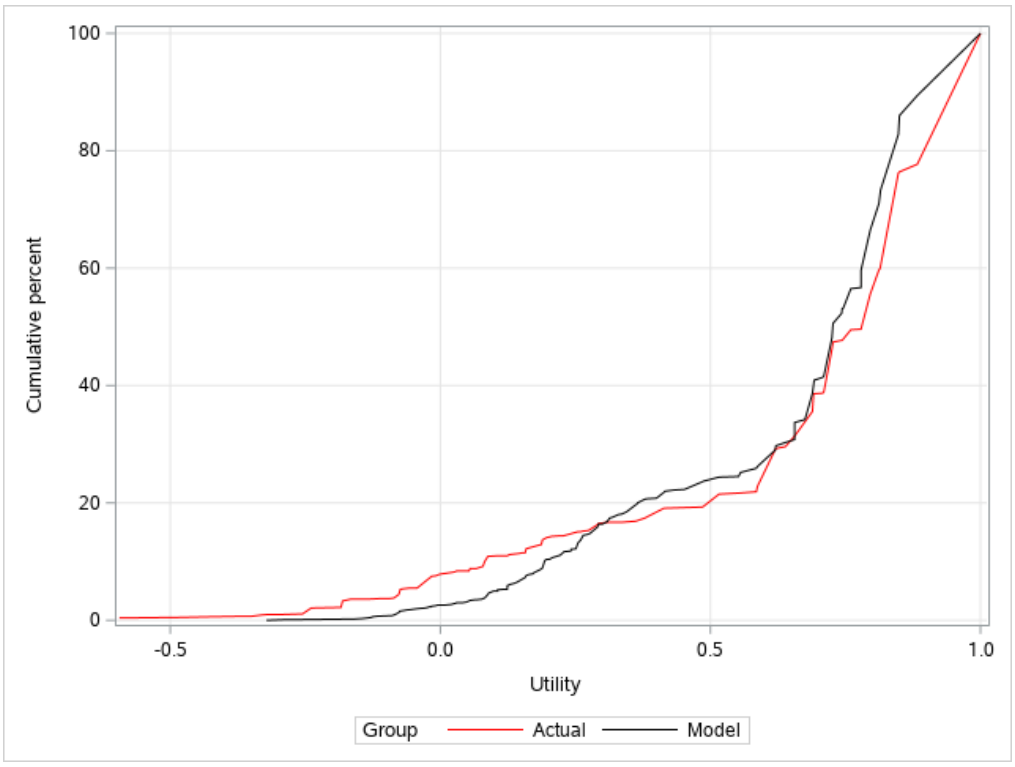

(j) Model ten: Cross validation set 10

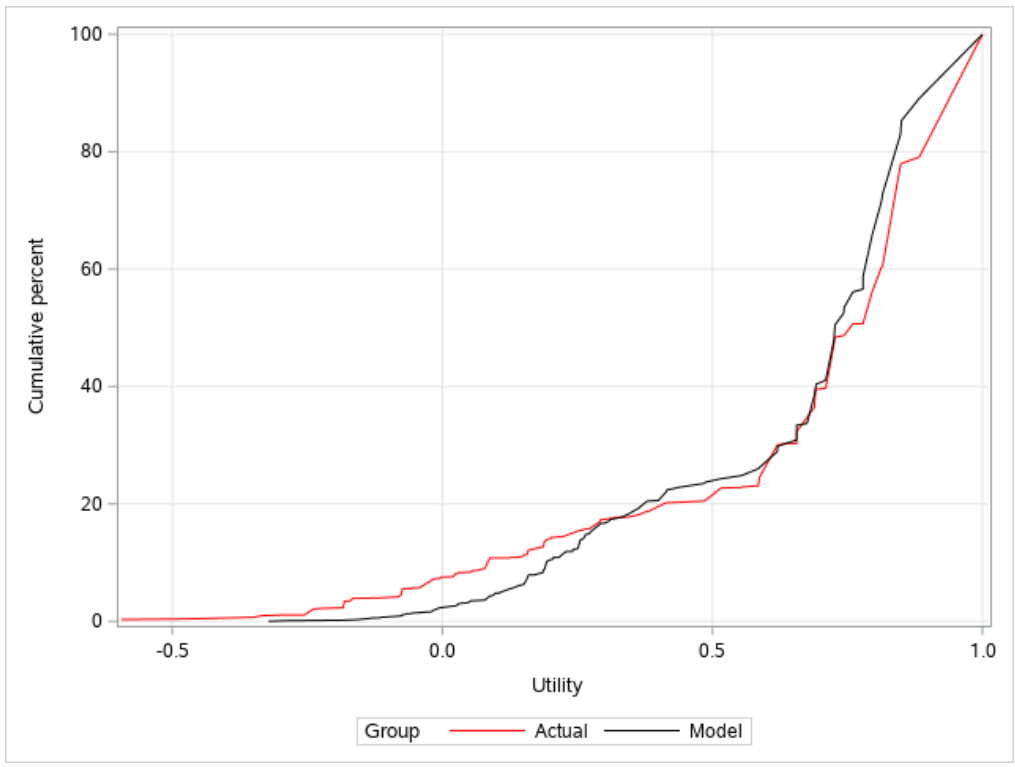



**Fig S3 (a)-(j)** Histograms demonstrating the mean difference between predicted and actual utility scores for each Monte Carlo simulation

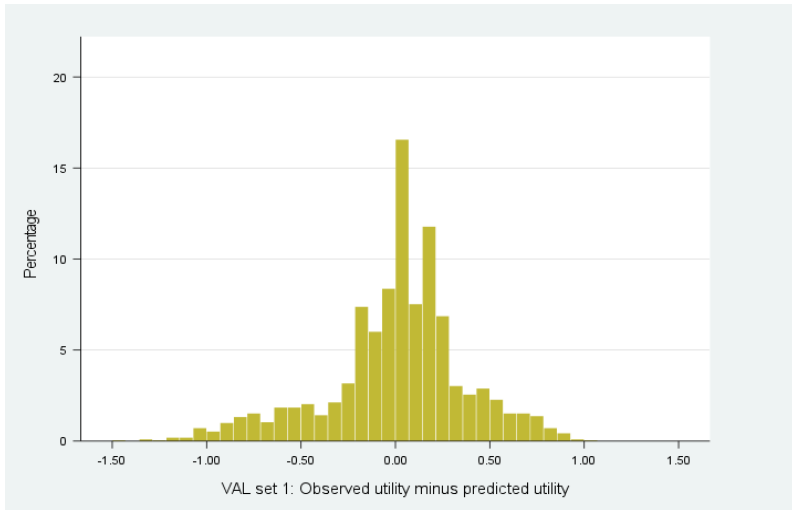

**(a)**

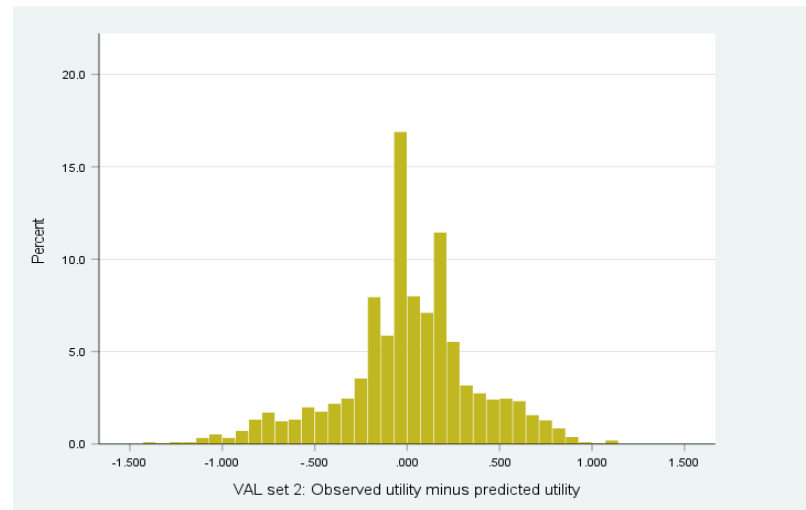

**(b)**

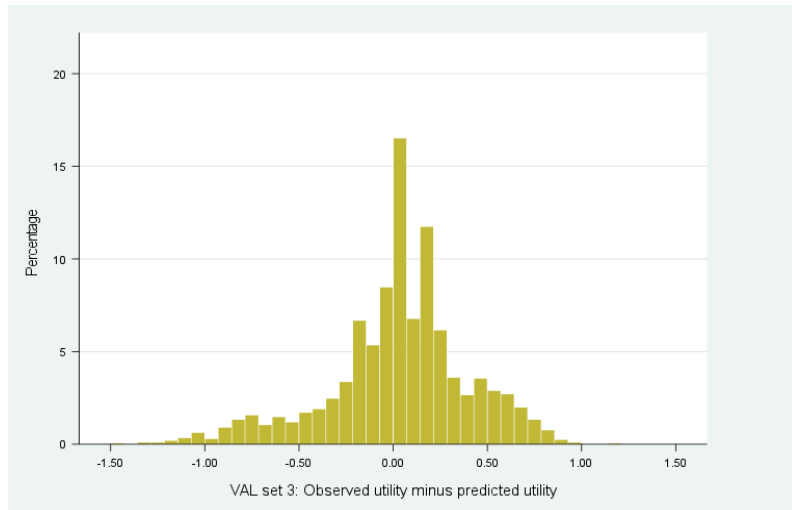

**(c)**

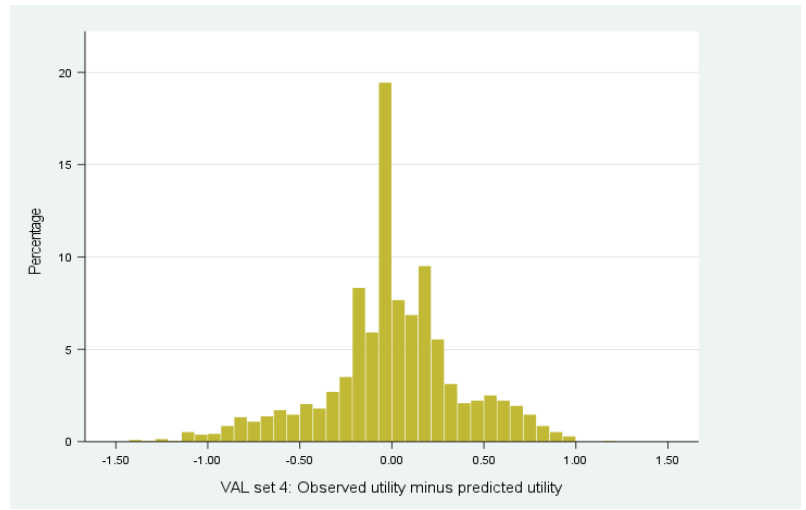

**(d)**

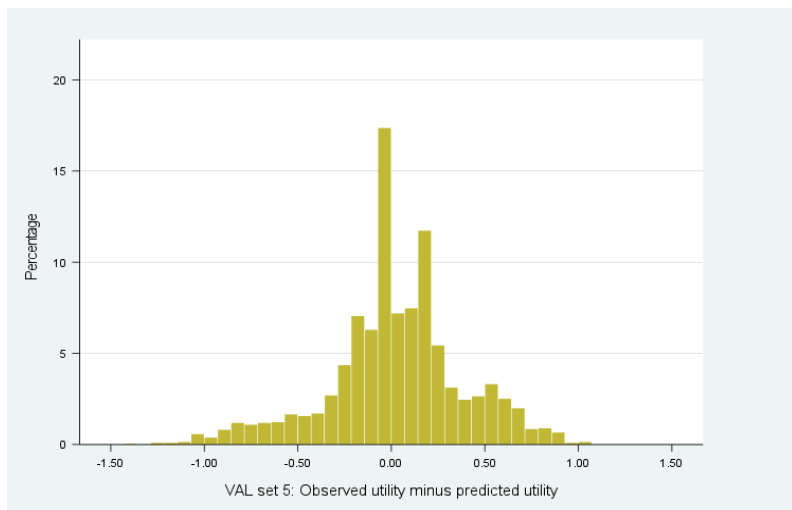

**(e)**

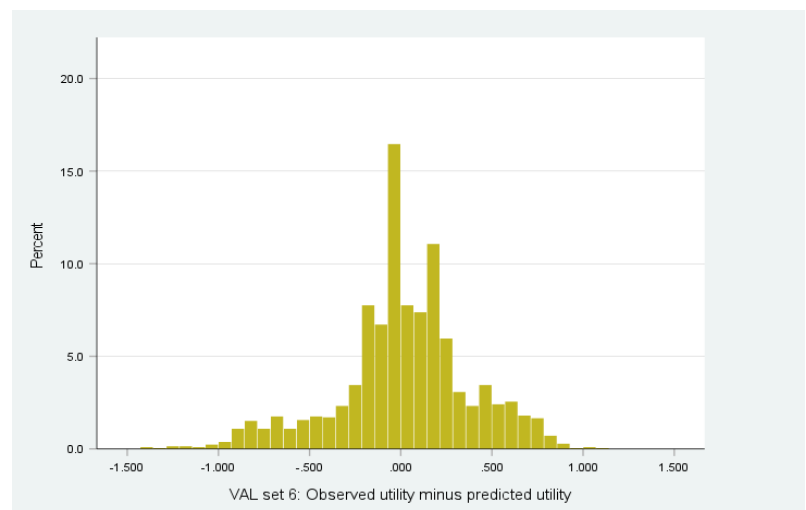

**(f)**

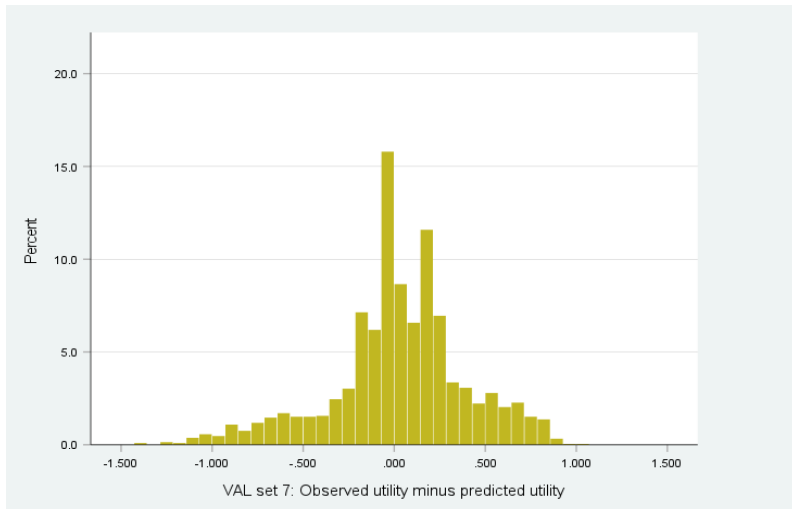

**(g)**

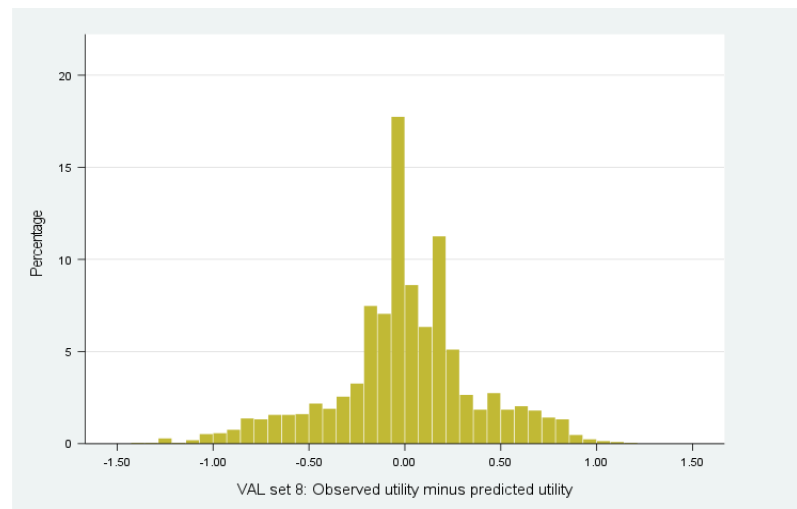

**(h)**

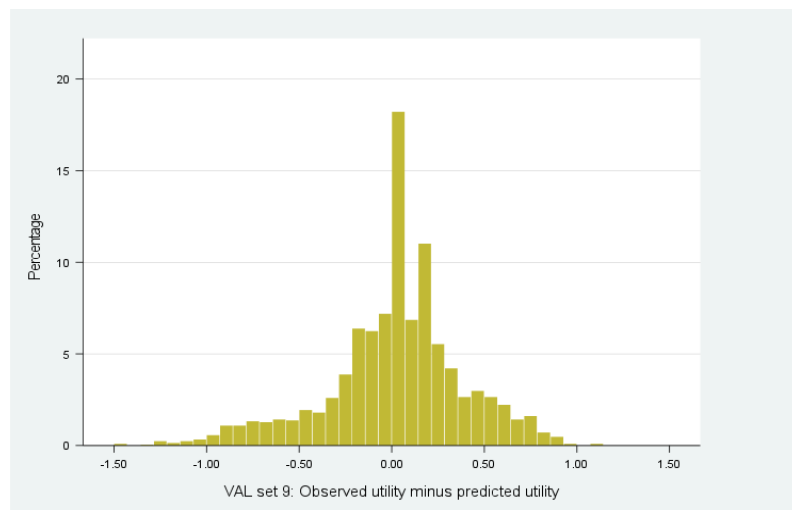

**(i)**

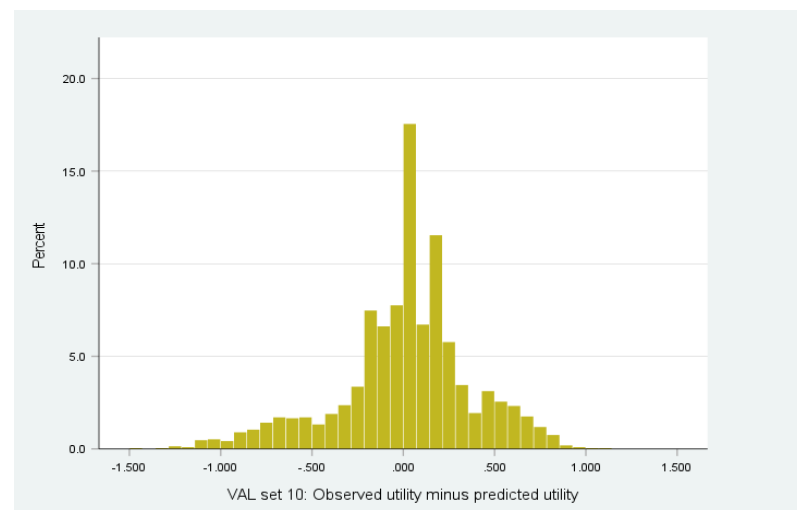

**(j)**
