# Supplementary material for: Mapping of Family Reported Outcome Measure (FROM-16) scores to EQ-5D: algorithm to calculate utility values
Source: Springer Nature journal article supplement (doi:10.1007/s11136-023-03590-z), 2024-02-25
Supplement: MOESM2 [file 26780468]

**Supplementary File 2**

**Mapping of Family Reported Outcome Measure (FROM-16) scores to EQ-5D:  
Algorithm to calculate Utility Values**

Shah R, Salek MS, Finlay AY, Kay R, Nixon SJ, Otworld K, Ali MF, Ingram JR

# How to use the FROM-16 mapping algorithm

**Corresponding author:**

[ShahR45@cardiff.ac.uk](mailto:ShahR45@cardiff.ac.uk)

Microsoft Excel spreadsheet<sup>®</sup> with pre-programmed formulae is available upon request

The mapping of the FROM-16 scores to utility values for use in economic appraisal should be based on aggregated group scores. The example provided is for illustrative purposes only and should not be replicated as such.

**Step 1: Enter the respondent’s age, sex, and the responses to the 16 items of FROM-16, as shown below in the Excel sheet**

| Conversion of FROM-16 Item Score to EQ-5D utility values Using Multinomial Logistic Regression (Enter family member (FM) Age, Sex & FROM-16 scores below per subject) |                                                                                                                                                                                                                                                                                                                                                                                                                                                                                                                                                                                                                                                                                                                                                                                                                                                                                                                                                                                                                                                                                                                                                                                                                                                                                                                                                                                                                                                                                                                                                                                                                                                                                                                                                                                                                                                                                   |                |                  |       |       |     |            |                        |                   |               |        |               |                   |         |          |               |                      |                 |       |
|-----------------------------------------------------------------------------------------------------------------------------------------------------------------------|-----------------------------------------------------------------------------------------------------------------------------------------------------------------------------------------------------------------------------------------------------------------------------------------------------------------------------------------------------------------------------------------------------------------------------------------------------------------------------------------------------------------------------------------------------------------------------------------------------------------------------------------------------------------------------------------------------------------------------------------------------------------------------------------------------------------------------------------------------------------------------------------------------------------------------------------------------------------------------------------------------------------------------------------------------------------------------------------------------------------------------------------------------------------------------------------------------------------------------------------------------------------------------------------------------------------------------------------------------------------------------------------------------------------------------------------------------------------------------------------------------------------------------------------------------------------------------------------------------------------------------------------------------------------------------------------------------------------------------------------------------------------------------------------------------------------------------------------------------------------------------------|----------------|------------------|-------|-------|-----|------------|------------------------|-------------------|---------------|--------|---------------|-------------------|---------|----------|---------------|----------------------|-----------------|-------|
|                                                                                                                                                                       | A                                                                                                                                                                                                                                                                                                                                                                                                                                                                                                                                                                                                                                                                                                                                                                                                                                                                                                                                                                                                                                                                                                                                                                                                                                                                                                                                                                                                                                                                                                                                                                                                                                                                                                                                                                                                                                                                                 | B              | C                | D     | E     | F   | G          | H                      | I                 | J             | K      | L             | M                 | N       | O        | P             | Q                    | R               | S     |
| 2                                                                                                                                                                     | Subject ID                                                                                                                                                                                                                                                                                                                                                                                                                                                                                                                                                                                                                                                                                                                                                                                                                                                                                                                                                                                                                                                                                                                                                                                                                                                                                                                                                                                                                                                                                                                                                                                                                                                                                                                                                                                                                                                                        | FM Age (years) | FM Sex M= 0, F=1 | Worry | Angry | Sad | Frustrated | Talking about thoughts | Difficulty caring | Time for self | Travel | Eating habits | Family activities | Holiday | Sex life | Work or study | Family relationships | Family expenses | Sleep |
| 3                                                                                                                                                                     |                                                                                                                                                                                                                                                                                                                                                                                                                                                                                                                                                                                                                                                                                                                                                                                                                                                                                                                                                                                                                                                                                                                                                                                                                                                                                                                                                                                                                                                                                                                                                                                                                                                                                                                                                                                                                                                                                   |                |                  |       |       |     |            |                        |                   |               |        |               |                   |         |          |               |                      |                 |       |
| 4                                                                                                                                                                     | 1                                                                                                                                                                                                                                                                                                                                                                                                                                                                                                                                                                                                                                                                                                                                                                                                                                                                                                                                                                                                                                                                                                                                                                                                                                                                                                                                                                                                                                                                                                                                                                                                                                                                                                                                                                                                                                                                                 | 73             | 0                | 1     | 0     | 0   | 1          | 1                      | 2                 | 0             | 0      | 1             | 0                 | 0       | 0        | 0             | 0                    | 0               | 1     |
| 5                                                                                                                                                                     |                                                                                                                                                                                                                                                                                                                                                                                                                                                                                                                                                                                                                                                                                                                                                                                                                                                                                                                                                                                                                                                                                                                                                                                                                                                                                                                                                                                                                                                                                                                                                                                                                                                                                                                                                                                                                                                                                   |                |                  |       |       |     |            |                        |                   |               |        |               |                   |         |          |               |                      |                 |       |
| 6                                                                                                                                                                     |                                                                                                                                                                                                                                                                                                                                                                                                                                                                                                                                                                                                                                                                                                                                                                                                                                                                                                                                                                                                                                                                                                                                                                                                                                                                                                                                                                                                                                                                                                                                                                                                                                                                                                                                                                                                                                                                                   |                |                  |       |       |     |            |                        |                   |               |        |               |                   |         |          |               |                      |                 |       |
| 9                                                                                                                                                                     | <b>Step 2: Substitute the values of constant, regression coefficients and values of the independent variables from Table 5 in the manuscript in the two equations below (when using an Excel sheet, add values for each cell See the example on the next page: for example for “FM Age=73” we can simply write “B4”).</b>                                                                                                                                                                                                                                                                                                                                                                                                                                                                                                                                                                                                                                                                                                                                                                                                                                                                                                                                                                                                                                                                                                                                                                                                                                                                                                                                                                                                                                                                                                                                                         |                |                  |       |       |     |            |                        |                   |               |        |               |                   |         |          |               |                      |                 |       |
| 10                                                                                                                                                                    |                                                                                                                                                                                                                                                                                                                                                                                                                                                                                                                                                                                                                                                                                                                                                                                                                                                                                                                                                                                                                                                                                                                                                                                                                                                                                                                                                                                                                                                                                                                                                                                                                                                                                                                                                                                                                                                                                   |                |                  |       |       |     |            |                        |                   |               |        |               |                   |         |          |               |                      |                 |       |
| 11                                                                                                                                                                    |                                                                                                                                                                                                                                                                                                                                                                                                                                                                                                                                                                                                                                                                                                                                                                                                                                                                                                                                                                                                                                                                                                                                                                                                                                                                                                                                                                                                                                                                                                                                                                                                                                                                                                                                                                                                                                                                                   |                |                  |       |       |     |            |                        |                   |               |        |               |                   |         |          |               |                      |                 |       |
| 12                                                                                                                                                                    | $\log\left(\frac{\pi_2}{\pi_1}\right) = \alpha_{mobility (Some\ problem)} + (\beta_{age} * Age) + (\beta_{sex} * Sex) + (\beta_{worry} * Worry) + (\beta_{angry} * Angry) + (\beta_{sad} * Sad) + (\beta_{frustrated} * Frustrated) + (\beta_{thoughts} * Talking\ about\ thoughts) + (\beta_{caring} * Difficulty\ caring) + (\beta_{time\ for\ self} * Time\ for\ self) + (\beta_{travel} * Travel) + (\beta_{eating\ habits} * Eating\ habits) + (\beta_{family\ activities} * Family\ activities) + (\beta_{holiday} * Holiday) + (\beta_{sex\ life} * Sex\ life) + (\beta_{work} * Work/study) + (\beta_{family\ relationship} * Family\ relationship) + (\beta_{family\ expenses} * Family\ expenses) + (\beta_{sleep} * Sleep)$ $\log\left(\frac{\pi_3}{\pi_1}\right) = \alpha_{mobility(Extrem\ problem)} + (\beta_{age} * Age) + (\beta_{sex} * Sex) + (\beta_{worry} * Worry) + (\beta_{angry} * Angry) + (\beta_{sad} * Sad) + (\beta_{frustrated} * Frustrated) + (\beta_{thoughts} * Talking\ about\ thoughts) + (\beta_{caring} * Difficulty\ caring) + (\beta_{time\ for\ self} * Time\ for\ self) + (\beta_{travel} * Travel) + (\beta_{eating\ habits} * Eating\ habits) + (\beta_{family\ activities} * Family\ activities) + (\beta_{holiday} * Holiday) + (\beta_{sex\ life} * Sex\ life) + (\beta_{work} * Work/study) + (\beta_{family\ relationship} * Family\ relationship) + (\beta_{family\ expenses} * Family\ expenses) + (\beta_{sleep} * Sleep)$ <p><math>\alpha</math> = the constant of the equation<br/> <math>\beta</math> = the coefficient of the predictor or independent variables( here age, gender and 16 items of FROM-16), <math>\beta</math> is the effect of the independent variable on the log-odds of being in category 2(some problem) and category 3 (Extreme problem) instead of category 1(no problem) in above equations.</p> |                |                  |       |       |     |            |                        |                   |               |        |               |                   |         |          |               |                      |                 |       |

PAGE 2 of EXCEL Sheet -Mapping Algorithm using Multinomial logistic regression

Estimated probability of each score per EQ-5D domain per subject (copy formula\* down each column up to the last subject)

|    | U          | V          | W     | X     | Y     | Z          | AA         | AB    | AC    | AD    | AE               | AF         | AG    | AH    | AI    | AJ              | AK         | AL    | AM    | AN    | AO                 | AP         | AQ    | AR    | AS    |
|----|------------|------------|-------|-------|-------|------------|------------|-------|-------|-------|------------------|------------|-------|-------|-------|-----------------|------------|-------|-------|-------|--------------------|------------|-------|-------|-------|
| 3  | MOBILITY   |            |       |       |       | Selfcare   |            |       |       |       | Usual activities |            |       |       |       | Pain/Discomfort |            |       |       |       | Anxiety/Depression |            |       |       |       |
| 4  | log(n2/n1) | log(n3/n1) | P1    | P2    | P3    | log(n2/n1) | log(n3/n1) | P1    | P2    | P3    | log(n2/n1)       | log(n3/n1) | P1    | P2    | P3    | log(n2/n1)      | log(n3/n1) | P1    | P2    | P3    | log(n2/n1)         | log(n3/n1) | P1    | P2    | P3    |
| 5  | -0.449     | -5.984     | 0.609 | 0.389 | 0.002 | -1.8200    | -5.8340    | 0.858 | 0.139 | 0.003 | -0.5460          | -3.5690    | 0.622 | 0.360 | 0.018 | 0.0500          | -1.3480    | 0.433 | 0.455 | 0.112 | -0.8190            | -3.1780    | 0.675 | 0.297 | 0.028 |
| 6  |            |            |       |       |       |            |            |       |       |       |                  |            |       |       |       |                 |            |       |       |       |                    |            |       |       |       |
| 7  |            |            |       |       |       |            |            |       |       |       |                  |            |       |       |       |                 |            |       |       |       |                    |            |       |       |       |
| 9  |            |            |       |       |       |            |            |       |       |       |                  |            |       |       |       |                 |            |       |       |       |                    |            |       |       |       |
| 10 |            |            |       |       |       |            |            |       |       |       |                  |            |       |       |       |                 |            |       |       |       |                    |            |       |       |       |

Using FROM -16 values from Table 1, Estimated probabilities can be calculated using probability equations derived from Multinomial logistic regression as below (Example of first row)

| Eq-5D-3L dimensions | Formula*      | P1                                 | P2                                        | P3                                         |
|---------------------|---------------|------------------------------------|-------------------------------------------|--------------------------------------------|
| Mobility            | U=log(n2/n1)  | 1/(1+EXP(U4)+EXP(V4))<br>= 0.609   | EXP(U4)/(1+EXP(U4)+EXP(V4))<br>= 0.389    | =EXP(V4)/(1+EXP(U4)+EXP(V4))<br>= 0.002    |
|                     | V=log(n3/n1)  |                                    |                                           |                                            |
| Selfcare            | Z=log(n2/n1)  | 1/(1+ EXP(Z4)+EXP(AA4))<br>= 0.858 | =EXP(Z4)/(1+EXP(Z4)+EXP(AA4))<br>= 0.139  | =EXP(AA4)/(1+EXP(Z4)+EXP(AA4))<br>= 0.003  |
|                     | AA=log(n3/n1) |                                    |                                           |                                            |
| Usual activities    | AE=log(n2/n1) | 1/(1+EXP(AE4)+EXP(AF4))<br>= 0.622 | EXP(AE4)/(1+EXP(AE4)+EXP(AF4))<br>= 0.360 | =EXP(AF4)/(1+EXP(AE4)+EXP(AF4))<br>= 0.018 |
|                     | AF=log(n3/n1) |                                    |                                           |                                            |
| Pain/Discomfort     | AJ=log(n2/n1) | 1/(1+EXP(AJ4)+EXP(AK4))<br>=0.433  | =EXP(AJ4)/(1+EXP(AJ4)+EXP(AK4))<br>=0.455 | =EXP(AK4)/(1+EXP(AJ4)+EXP(AK4))<br>=0.112  |
|                     | AK=log(n3/n1) |                                    |                                           |                                            |
| Anxiety/Depression  | AO=log(n2/n1) | 1/(1+EXP(AO4)+EXP(AP4))<br>= 0.675 | EXP(AO4)/(1+EXP(AO4)+EXP(AP4))<br>= 0.297 | EXP(AP4)/(1+EXP(AO4)+EXP(AP4))<br>= 0.028  |
|                     | AP=log(n3/n1) |                                    |                                           |                                            |

Microsoft Excel spreadsheet® with pre-programmed formulae is available upon request

PAGE 3 of EXCEL Sheet -Mapping Algorithm Monte Carlo Simulation method

|   | AU                                                                                                    | AV              | AW                      | AX                     | AY                        | AZ                     | BA                                                                                                                                                                                                                                                                                                   | BB             | BC                     | BD                     | BE                        | BF                                                                                                            | BG              |
|---|-------------------------------------------------------------------------------------------------------|-----------------|-------------------------|------------------------|---------------------------|------------------------|------------------------------------------------------------------------------------------------------------------------------------------------------------------------------------------------------------------------------------------------------------------------------------------------------|----------------|------------------------|------------------------|---------------------------|---------------------------------------------------------------------------------------------------------------|-----------------|
| 1 | Random Number Generator* for each domain (formula* random number generator is given in the box below) |                 |                         |                        |                           | Monte Carlo Simulation | Predicted score for each EQ-5D domain# ( formula for each dimension is given in the box below)                                                                                                                                                                                                       |                |                        |                        |                           | Conversion of EQ-5D-3L domain score to Utility value                                                          | RESULTS         |
| 2 | Mobility Random                                                                                       | Selfcare Random | Usual activities Random | Pain/Discomfort Random | Anxiety/Depression Random |                        | Mobility Score                                                                                                                                                                                                                                                                                       | Selfcare Score | Usual Activities Score | Pain/ Discomfort Score | Anxiety/ Depression Score |                                                                                                               | Utility value # |
| 3 |                                                                                                       |                 |                         |                        |                           |                        |                                                                                                                                                                                                                                                                                                      |                |                        |                        |                           |                                                                                                               |                 |
| 4 | 0.4327                                                                                                | 0.3375          | 0.4336                  | 0.6160                 | 0.7480                    |                        | 1                                                                                                                                                                                                                                                                                                    | 1              | 1                      | 2                      | 2                         | 0.725                                                                                                         |                 |
| 5 |                                                                                                       |                 |                         |                        |                           |                        | <p><i>The predicted domain scores may be converted to utility scores using the relevant TTO value sets specific to your country. These value sets as well as the syntax for SPSS (incase of large datasets) may be obtained from <a href="http://www.euroqol.org">http://www.euroqol.org</a></i></p> |                |                        |                        |                           | <p>#The utility value is calculated here using the UK MVH tariff equation developed by Dolan et al. 1996.</p> |                 |

**Step 3: Generate random numbers between 0 and 1 using the formula\*=RAND()**

**Step 4: Predict the EQ-5D-3L domain response score using the formula below (linked to predicted domain probabilities on page 2)**

Mobility score = IF(AU4=<W4,1,0)+IF(AND(AU4>W4,AU4=<(W4+X4)),2,0)+IF(AU4>(1-Y4),3,0)  
 Selfcare = IF(AV4=<AB4,1,0)+IF(AND(AV4>AB4,AV4=<(AB4+AC4)),2,0)+IF(AV4>(1-AD4),3,0)  
 Usual activities = IF(AW4=<AG4,1,0)+IF(AND(AW4>AG4,AW4=<(AG4+AH4)),2,0)+IF(AW4>(1-AI4),3,0)  
 Pain/Discomfort = IF(AX4=<AL4,1,0)+IF(AND(AX4=AL4,AX4=<(AL4+AM4)),2,0)+IF(AX4>(1-AN4),3,0)  
 Anxiety/Depression = =IF(AY4=<AQ4,1,0)+IF(AND(AY4>AQ4,AY4=<(AQ4+AR4)),2,0)+IF(AY4>(1-AS4),3,0)

**Step 5: Utility value can now be calculated using UK TTO tariff. In this example we have calculated a health state of 11122 using the respondent’s FROM-16 score, age and sex, which is equal to a utility value of 0.725. \*Please note the algorithm is more accurate at the group level. The example shown here, with data from a single subject, is to inform readers how to use the mapping algorithm.**
